# Supplementary material for: Dietary Antioxidant Vitamins and Minerals and Breast Cancer Risk: Prospective Results from the SUN Cohort
Source: PubMed Central journal article supplement (PMC7996327; doi:10.3390/antiox10030340), 2021-02-24
Supplement: antioxidants-10-00340-s001.pdf [file antioxidants-10-00340-s001.pdf]

# Supplementary Materials

## Dietary Antioxidant Vitamins and Minerals and Breast Cancer Risk: Prospective Results from the SUN Cohort

Cesar I Fernandez-Lazaro, Miguel Ángel Martínez-González, Inmaculada Aguilera-Buenosvinos, Alfredo Gea, Miguel Ruiz-Canela, Andrea Romanos-Nanclares and Estefanía Toledo

**Supplemental Table s1:** Sources of variability (cumulative R<sup>2</sup>) and main sources (%) in dietary vitamin A, vitamin C, vitamin E, selenium, and zinc intake according to each food included in the FFQ and food groups.

**Supplemental Table s2:** Sensitivity analyses: luminal breast cancer. Hazard Ratio (HR) and 95% Confidence Interval (CI) of luminal breast cancer by tertiles of energy-adjusted dietary vitamins A, C, and E, selenium and zinc at baseline among female participants of the SUN cohort (n= 9,983).

**Supplemental Table s3:** Sensitivity analyses: excluding participants with a follow-up < 2 years. Hazard Ratio (HR) and 95% Confidence Interval (CI) for overall, premenopausal, and postmenopausal breast cancer excluding participants with short period of follow-up (<2 years after entering into the cohort).

**Supplemental Table s4:** Sensitivity analyses: truncating participants' follow-up at 10 years. Hazard Ratio (HR) and 95% Confidence Interval (CI) for overall, premenopausal, and postmenopausal breast cancer truncating follow-up after 10 years.

**Supplemental Table s5:** Sensitivity analyses: total (dietary + supplements) intake of vitamins A, C, and E, and zinc. Hazard Ratio (HR) and 95% Confidence Interval (CI) of breast cancer by tertiles of energy-adjusted of total (dietary + supplements) intake of vitamins A, C, and E, and zinc at baseline among female participants of the SUN cohort.

Dietary Antioxidant Vitamins and Minerals and Breast Cancer Risk: Prospective Results from the SUN Cohort

**Table s1.** Sources of variability (cumulative R<sup>2</sup>) and main sources (%) in dietary Vitamin A, vitamin C, vitamin E, selenium, and zinc intake according to each food included in the FFQ and food groups.

| Food item / Food group | Cumulative R <sup>2</sup> | Percentage (%) of total dietary nutrient intake |
|------------------------|---------------------------|-------------------------------------------------|
| <i>Vitamin A</i>       |                           |                                                 |
| <b>Food item</b>       |                           |                                                 |
| Carrots                | 0.7913                    | 34.70                                           |
| Chards                 | 0.8909                    | 15.27                                           |
| Lettuce                | 0.9441                    | 12.90                                           |
| Sweet melon            | 0.9689                    | 4.51                                            |
| Tomatoes               | 0.9805                    | 8.09                                            |
| <b>Food group</b>      |                           |                                                 |
| Vegetables             | 0.9587                    | 73.45                                           |
| Fruits                 | 0.9876                    | 10.49                                           |
| Dairy products         | 0.9986                    | 9.18                                            |
| Fats and oils          | 0.9995                    | 1.69                                            |
| Eggs                   | 0.9997                    | 2.16                                            |
| <i>Vitamin C</i>       |                           |                                                 |
| <b>Food item</b>       |                           |                                                 |
| Peppers                | 0.3422                    | 18.70                                           |
| Oranges                | 0.6468                    | 13.88                                           |
| Kiwi                   | 0.7654                    | 6.83                                            |
| Lettuce                | 0.8094                    | 6.41                                            |
| Sweet melon            | 0.8451                    | 3.20                                            |
| <b>Food group</b>      |                           |                                                 |
| Vegetables             | 0.5825                    | 53.20                                           |
| Fruits                 | 0.9898                    | 36.98                                           |
| Cereals and legumes    | 0.9931                    | 1.6                                             |
| Dairy products         | 0.9938                    | 2.37                                            |
| Meat and meat products | 0.9940                    | 0.49                                            |
| <i>Vitamin E</i>       |                           |                                                 |
| <b>Food item</b>       |                           |                                                 |
| Nuts                   | 0.3407                    | 13.20                                           |
| Sunflower oil          | 0.6819                    | 7.08                                            |
| Marzipan               | 0.7718                    | 4.69                                            |
| Olive oil              | 0.8321                    | 13.55                                           |
| Peppers                | 0.8624                    | 5.53                                            |
| <b>Food group</b>      |                           |                                                 |
| Fats and oils          | 0.4284                    | 28.04                                           |
| Nuts                   | 0.7871                    | 14.08                                           |
| Pastries               | 0.9066                    | 10.41                                           |
| Vegetables             | 0.9432                    | 9.48                                            |
| Cereals and legumes    | 0.9549                    | 6.94                                            |
| <i>Selenium</i>        |                           |                                                 |
| <b>Food item</b>       |                           |                                                 |
| Eggs                   | 0.2808                    | 26.36                                           |

|             |        |       |
|-------------|--------|-------|
| White bread | 0.4958 | 14.84 |
| White fish  | 0.6812 | 11.06 |
| Whole bread | 0.8151 | 4.91  |
| Fatty fish  | 0.9178 | 10.88 |

**Food group**

|                        |        |       |
|------------------------|--------|-------|
| Cereals and legumes    | 0.4041 | 21.49 |
| Fish and seafood       | 0.7089 | 26.45 |
| Eggs                   | 0.9405 | 26.36 |
| Meat and meat products | 0.9701 | 10.47 |
| Dairy products         | 0.9916 | 8.03  |

*Zinc*

**Food item**

|                |        |       |
|----------------|--------|-------|
| Low-fat yogurt | 0.7680 | 17.48 |
| Beef           | 0.8062 | 8.61  |
| Cream cheese   | 0.8340 | 4.59  |
| White bread    | 0.8559 | 6.86  |
| Whole bread    | 0.8813 | 2.79  |

**Food group**

|                        |        |       |
|------------------------|--------|-------|
| Dairy products         | 0.8194 | 30.96 |
| Meat and meat products | 0.8993 | 26.02 |
| Cereals and legumes    | 0.9581 | 15.86 |
| Vegetables             | 0.9800 | 9.90  |
| Fruits                 | 0.9869 | 4.73  |

---

**Table s2.** Sensitivity analyses: luminal breast cancer. Hazard Ratio (HR) and 95% Confidence Interval (CI) of luminal breast cancer by tertiles of energy-adjusted dietary vitamins A, C, and E, selenium and zinc at baseline among female participants of the SUN cohort (n= 9,983).

| Variables                          | Tertiles of energy-adjusted of dietary intake |                  |                  | P for trend |
|------------------------------------|-----------------------------------------------|------------------|------------------|-------------|
|                                    | T1                                            | T2               | T3               |             |
| <i>Vitamin A</i>                   |                                               |                  |                  |             |
| Intake range, (mcg/d)              | < 1,387                                       | 1,387-2,282      | >2,282           |             |
| Mean intake, (mcg/d)               | 1,033                                         | 1,747            | 2,984            |             |
| No of participants                 | 3,328                                         | 3,328            | 3,327            |             |
| Person-years                       | 38,540                                        | 37,718           | 36,740           |             |
| Cases                              | 16                                            | 16               | 25               |             |
| Incidence rate/10,000 person-years | 4,15                                          | 4,24             | 6,80             |             |
| Age-adjusted                       | 1.00 (reference)                              | 0.93 (0.46-1.86) | 1.35 (0.72-2.54) | 0.264       |
| Model 1                            | 1.00 (reference)                              | 0.90 (0.45-1.82) | 1.38 (0.73-2.64) | 0.229       |
| Model 2                            | 1.00 (reference)                              | 0.93 (0.45-1.91) | 1.43 (0.71-2.89) | 0.229       |
| <i>Vitamin C</i>                   |                                               |                  |                  |             |
| Intake range, (mg/d)               | < 219                                         | 219-322          | >322             |             |
| Mean intake, (mg/d)                | 168                                           | 265              | 406              |             |
| No of participants                 | 3,328                                         | 3,328            | 3,327            |             |
| Person-years                       | 38,458                                        | 37,754           | 36,787           |             |
| Cases                              | 21                                            | 14               | 22               |             |
| Incidence rate/10,000 person-years | 5.46                                          | 3.71             | 5.98             |             |
| Age-adjusted                       | 1.00 (reference)                              | 0.63 (0.32-1.24) | 0.92 (0.50-1.68) | 0.922       |
| Model 1, (mg/d)                    | 1.00 (reference)                              | 0.65 (0.33-1.29) | 0.98 (0.53-1.83) | 0.910       |
| Model 2, (mg/d)                    | 1.00 (reference)                              | 0.59 (0.29-1.21) | 0.88 (0.42-1.83) | 0.897       |
| <i>Vitamin E</i>                   |                                               |                  |                  |             |
| Intake range, (mg/d)               | < 5.56                                        | 5.56-7.15        | >7.15            |             |
| Mean intake, (mg/d)                | 4.68                                          | 6.30             | 8.87             |             |
| No of participants                 | 3,328                                         | 3,328            | 3,327            |             |
| Person-years                       | 38,036                                        | 37,475           | 37,488           |             |
| Cases                              | 21                                            | 18               | 18               |             |
| Incidence rate/10,000 person-years | 5.52                                          | 4.80             | 4.80             |             |
| Age-adjusted                       | 1.00 (reference)                              | 0.85 (0.46-1.60) | 0.85 (0.45-1.60) | 0.644       |
| Model 1                            | 1.00 (reference)                              | 0.88 (0.47-1.65) | 0.89 (0.47-1.67) | 0.730       |
| Model 2                            | 1.00 (reference)                              | 0.93 (0.47-1.85) | 1.03 (0.51-2.09) | 0.895       |
| <i>Selenium</i>                    |                                               |                  |                  |             |
| Intake range, (mcg/d)              | < 80.9                                        | 80.9-101.1       | >101.1           |             |
| Mean intake, (mcg/d)               | 69.0                                          | 90.5             | 114.5            |             |
| No of participants                 | 3,328                                         | 3,328            | 3,327            |             |
| Person-years                       | 3.96                                          | 3.99             | 7.19             |             |
| Cases                              | 15                                            | 15               | 27               |             |
| Incidence rate/10,000 person-years | 3.96                                          | 3.99             | 7.19             |             |
| Age-adjusted                       | 1.00 (reference)                              | 0.92 (0.45-1.87) | 1.49 (0.79-2.80) | 0.169       |
| Model 1                            | 1.00 (reference)                              | 0.90 (0.44-1.86) | 1.52 (0.80-2.88) | 0.153       |
| Model 2                            | 1.00 (reference)                              | 0.89 (0.43-1.85) | 1.58 (0.81-3.11) | 0.136       |

Zinc

|                                    |                  |                  |                  |       |
|------------------------------------|------------------|------------------|------------------|-------|
| Intake range, (mg/d)               | < 12.8           | 12.8-17.2        | >17.2            |       |
| Mean intake, (mg/d)                | 11.5             | 14.2             | 22.9             |       |
| No of participants                 | 3,328            | 3,328            | 3,327            |       |
| Person-years                       | 39,115           | 37,831           | 36,053           |       |
| Cases                              | 19               | 16               | 22               |       |
| Incidence rate/10,000 person-years | 4.86             | 4.22             | 6.10             |       |
| Age-adjusted                       | 1.00 (reference) | 0.84 (0.43-1.63) | 1.19 (0.64-2.21) | 0.413 |
| Model 1                            | 1.00 (reference) | 0.85 (0.43-1.66) | 1.27 (0.68-2.40) | 0.311 |
| Model 2                            | 1.00 (reference) | 0.81 (0.41-1.62) | 1.16 (0.58-2.30) | 0.465 |

Abbreviations: CI, confidence interval; HR, hazard ratio; Ref., reference.

- Model 1: crude model additionally adjusted for age of menarche (four categories), age at menopause (three categories), alcohol intake (g/d, continuous), breast-feeding (months, continuous), BMI (kg/m<sup>2</sup>, continuous), height (cm, continuous), hormone replacement therapy (dichotomous), obstetric history (five categories), physical activity (metabolic equivalent-h/week, continuous), relatives with history of breast cancer (three categories), smoking habit (package/year, continuous), smoking status (three categories), and years at university (continuous).

- Model 2: model 1 additionally adjusted for calcium intake (mg/d, continuous), coffee consumption (two categories), fat intake (E%, continuous), Mediterranean diet adherence (points, continuous), sugar-sweetened beverages (three categories), total energy intake (Kcal/d, continuous), TV-watching (hours/d, continuous), and use of supplements (dichotomous).

| Variable                           | Overall                                        |                  |                  | <i>P</i> for trend | Premenopausal                                  |                  |                  | <i>P</i> for trend | Postmenopausal                                 |                  |                  | <i>P</i> for trend |
|------------------------------------|------------------------------------------------|------------------|------------------|--------------------|------------------------------------------------|------------------|------------------|--------------------|------------------------------------------------|------------------|------------------|--------------------|
|                                    | Tertiles of energy-adjusted of dietary intakes |                  |                  |                    | Tertiles of energy-adjusted of dietary intakes |                  |                  |                    | Tertiles of energy-adjusted of dietary intakes |                  |                  |                    |
|                                    | T1                                             | T2               | T3               |                    | T1                                             | T2               | T3               |                    | T1                                             | T2               | T3               |                    |
| <i>Vitamin A (mcg/d)</i>           |                                                |                  |                  |                    |                                                |                  |                  |                    |                                                |                  |                  |                    |
| No of participants                 | 3,304                                          | 3,303            | 3,303            |                    | 3,057                                          | 3,057            | 3,057            |                    | 983                                            | 982              | 982              |                    |
| Person-years                       | 31,897                                         | 31,055           | 30,113           |                    | 33,095                                         | 32,013           | 30,544           |                    | 6,292                                          | 6,854            | 6,821            |                    |
| Cases                              | 34                                             | 29               | 37               |                    | 21                                             | 18               | 16               |                    | 11                                             | 10               | 17               |                    |
| Incidence rate/10,000 person-years | 10.66                                          | 9.34             | 12.29            |                    | 6.35                                           | 5.62             | 5.24             |                    | 17.48                                          | 14.59            | 24.92            |                    |
| Adjusted Model                     | 1.00<br>(reference)                            | 0.86 (0.51-1.44) | 1.07 (0.63-1.80) | 0.695              | 1.00<br>(reference)                            | 0.90 (0.46-1.76) | 0.77 (0.37-1.60) | 0.484              | 1.00<br>(reference)                            | 0.85 (0.34-2.11) | 1.95 (0.82-4.65) | 0.075              |
| <i>Vitamin C (mg/d)</i>            |                                                |                  |                  |                    |                                                |                  |                  |                    |                                                |                  |                  |                    |
| No of participants                 | 3,304                                          | 3,303            | 3,303            |                    | 3,057                                          | 3,057            | 3,057            |                    | 983                                            | 982              | 982              |                    |
| Person-years                       | 31,824                                         | 31,088           | 30,154           |                    | 33,305                                         | 31,905           | 30,443           |                    | 5,995                                          | 6,918            | 7,054            |                    |
| Cases                              | 38                                             | 27               | 35               |                    | 21                                             | 18               | 16               |                    | 11                                             | 11               | 16               |                    |
| Incidence rate/10,000 person-years | 11.94                                          | 8.69             | 11.61            |                    | 6.31                                           | 5.64             | 5.26             |                    | 18.35                                          | 15.90            | 22.68            |                    |
| Adjusted Model                     | 1.00<br>(reference)                            | 0.71 (0.42-1.20) | 0.90 (0.51-1.57) | 0.825              | 1.00<br>(reference)                            | 0.80 (0.46-1.39) | 0.82 (0.44-1.52) | 0.571              | 1.00<br>(reference)                            | 1.07 (0.43-2.65) | 1.81 (0.70-4.72) | 0.184              |
| <i>Vitamin E (mg/d)</i>            |                                                |                  |                  |                    |                                                |                  |                  |                    |                                                |                  |                  |                    |
| No of participants                 | 3,304                                          | 3,303            | 3,303            |                    | 3,057                                          | 3,057            | 3,057            |                    | 983                                            | 982              | 982              |                    |
| Person-years                       | 31,346                                         | 30,849           | 30,870           |                    | 32,170                                         | 31,869           | 31,614           |                    | 6,575                                          | 6,553            | 6,838            |                    |
| Cases                              | 36                                             | 34               | 30               |                    | 15                                             | 25               | 15               |                    | 20                                             | 9                | 9                |                    |
| Incidence rate/10,000 person-years | 11.48                                          | 11.02            | 9.72             |                    | 4.66                                           | 7.84             | 4.74             |                    | 30.42                                          | 13.73            | 13.16            |                    |

|                                           |                     |                      |                  |       |                     |                      |                      |       |                     |                              |                              |              |
|-------------------------------------------|---------------------|----------------------|------------------|-------|---------------------|----------------------|----------------------|-------|---------------------|------------------------------|------------------------------|--------------|
| Adjusted Model                            | 1.00<br>(reference) | 1.01 (0.61-<br>1.67) | 0.91 (0.53-1.56) | 0.711 | 1.00<br>(reference) | 1.11 (0.64-<br>1.93) | 1.04 (0.58-<br>1.87) | 0.938 | 1.00<br>(reference) | <b>0.39 (0.17-<br/>0.93)</b> | <b>0.33 (0.13-<br/>0.82)</b> | <b>0.023</b> |
| <i>Selenium (mcg/d)</i>                   |                     |                      |                  |       |                     |                      |                      |       |                     |                              |                              |              |
| No of participants                        | 3,304               | 3,303                | 3,303            |       | 3,057               | 3,057                | 3,057                |       | 983                 | 982                          | 982                          |              |
| Person-years                              | 31,262              | 30,852               | 30,950           |       | 32,701              | 31,796               | 31,156               |       | 6,349               | 6,658                        | 6,960                        |              |
| Cases                                     | 29                  | 25                   | 46               |       | 16                  | 17                   | 22                   |       | 10                  | 8                            | 20                           |              |
| Incidence<br>rate/10,000 person-<br>years | 9.28                | 8.10                 | 14.86            |       | 4.89                | 5.35                 | 7.06                 |       | 15.75               | 12.01                        | 28.73                        |              |
| Adjusted Model                            | 1.00<br>(reference) | 0.80 (0.46-<br>1.38) | 1.46 (0.89-2.41) | 0.090 | 1.00<br>(reference) | 0.74 (0.41-<br>1.33) | 1.37 (0.80-<br>2.33) | 0.178 | 1.00<br>(reference) | 0.72 (0.27-<br>1.88)         | 1.89 (0.84-<br>4.25)         | 0.071        |
| <i>Zinc (mg/d)</i>                        |                     |                      |                  |       |                     |                      |                      |       |                     |                              |                              |              |
| No of participants                        | 3,304               | 3,303                | 3,303            |       | 3,057               | 3,057                | 3,057                |       | 983                 | 982                          | 982                          |              |
| Person-years                              | 32,470              | 31,218               | 29,377           |       | 33,314              | 31,848               | 30,491               |       | 6,403               | 6,598                        | 6,966                        |              |
| Cases                                     | 35                  | 32                   | 33               |       | 18                  | 18                   | 19                   |       | 13                  | 12                           | 13                           |              |
| Incidence<br>rate/10,000 person-<br>years | 10.78               | 10.25                | 11.23            |       | 5.40                | 5.65                 | 6.23                 |       | 20.3                | 18.2                         | 18.7                         |              |
| Adjusted Model                            | 1.00<br>(reference) | 0.96 (0.58-<br>1.59) | 1.07 (0.63-1.81) | 0.731 | 1.00<br>(reference) | 0.99 (0.57-<br>1.72) | 1.32 (0.75-<br>2.32) | 0.266 | 1.00<br>(reference) | 0.96 (0.42-<br>2.18)         | 0.98 (0.41-<br>2.31)         | 0.979        |

Abbreviations: CI, confidence interval; HR, hazard ratio; Ref., reference.

- Adjusted model: crude model additionally adjusted for age of menarche (four categories), age at menopause (three categories), alcohol intake (g/d, continuous), BMI (kg/m<sup>2</sup>, continuous), calcium intake (continuous), coffee consumption (two categories), fat intake (E%, continuous), height (cm, continuous), hormone replacement therapy (dichotomous) and its duration (continuous), Mediterranean diet adherence (continuous), months of breastfeeding (continuous), obstetric history (five categories), physical activity (metabolic equivalent-h/week, continuous), relatives with history of breast cancer (three categories), smoking habit (continuous), smoking status (three categories), sugar-sweetened beverages (three categories), total energy intake (Kcal/d, continuous), TV-watching (continuous), use of supplements (dichotomous), and years at university (continuous). For premenopausal women, models were not adjusted for age at menopause, hormone replacement therapy and its duration. For menopausal women, models were additionally adjusted for time since recruitment until the beginning of the time at risk (years, continuous).

Dietary Antioxidant Vitamins and Minerals and Breast Cancer Risk: Prospective Results from the SUN Cohort

| Variable                           | Overall                                        |                  |                  |             | Premenopausal                                  |                  |                  |             | Postmenopausal                                 |                  |                  |             |
|------------------------------------|------------------------------------------------|------------------|------------------|-------------|------------------------------------------------|------------------|------------------|-------------|------------------------------------------------|------------------|------------------|-------------|
|                                    | Tertiles of energy-adjusted of dietary intakes |                  |                  | P for trend | Tertiles of energy-adjusted of dietary intakes |                  |                  | P for trend | Tertiles of energy-adjusted of dietary intakes |                  |                  | P for trend |
|                                    | T1                                             | T2               | T3               |             | T1                                             | T2               | T3               |             | T1                                             | T2               | T3               |             |
| <i>Vitamin A (mcg/d)</i>           |                                                |                  |                  |             |                                                |                  |                  |             |                                                |                  |                  |             |
| No of participants                 | 3,328                                          | 3,328            | 3,327            |             | 3,077                                          | 3,077            | 3,076            |             | 723                                            | 723              | 723              |             |
| Person-years                       | 28,950                                         | 28,788           | 28,458           |             | 25,746                                         | 25,384           | 24,677           |             | 3,912                                          | 4,187            | 4,124            |             |
| Cases                              | 23                                             | 26               | 30               |             | 14                                             | 18               | 15               |             | 8                                              | 8                | 12               |             |
| Incidence rate/10,000 person-years | 7.94                                           | 9.03             | 10.54            |             | 5.44                                           | 7.09             | 6.08             |             | 20.45                                          | 19.11            | 29.10            |             |
| Adjusted Model                     | 1.00 (reference)                               | 1.10 (0.61-1.99) | 1.20 (0.65-2.20) | 0.570       | 1.00 (reference)                               | 1.42 (0.68-2.97) | 1.08 (0.48-2.44) | 0.989       | 1.00 (reference)                               | 0.92 (0.32-2.59) | 1.72 (0.62-4.80) | 0.230       |
| <i>Vitamin C (mg/d)</i>            |                                                |                  |                  |             |                                                |                  |                  |             |                                                |                  |                  |             |
| No of participants                 | 3,328                                          | 3,328            | 3,327            |             | 3,077                                          | 3,077            | 3,076            |             | 723                                            | 723              | 723              |             |
| Person-years                       | 28,923                                         | 28,768           | 58,505           |             | 25,895                                         | 25,349           | 24,563           |             | 3,739                                          | 4,141            | 4,343            |             |
| Cases                              | 23                                             | 20               | 36               |             | 15                                             | 13               | 19               |             | 6                                              | 12               | 10               |             |
| Incidence rate/10,000 person-years | 7.95                                           | 6.95             | 12.63            |             | 5.79                                           | 5.13             | 7.73             |             | 16.05                                          | 28.98            | 23.03            |             |
| Adjusted Model                     | 1.00 (reference)                               | 0.73 (0.43-1.22) | 1.00 (0.58-1.71) | 0.846       | 1.00 (reference)                               | 0.76 (0.44-1.31) | 0.88 (0.49-1.59) | 0.758       | 1.00 (reference)                               | 1.74 (0.69-4.39) | 2.04 (0.74-5.64) | 0.190       |
| <i>Vitamin E (mg/d)</i>            |                                                |                  |                  |             |                                                |                  |                  |             |                                                |                  |                  |             |
| No of participants                 | 3,328                                          | 3,328            | 3,327            |             | 3,077                                          | 3,077            | 3,076            |             | 723                                            | 723              | 723              |             |
| Person-years                       | 28,903                                         | 28,567           | 28,365           |             | 25,529                                         | 25,257           | 25,021           |             | 3,983                                          | 4,029            | 4,211            |             |
| Cases                              | 31                                             | 24               | 24               |             | 16                                             | 17               | 14               |             | 15                                             | 6                | 7                |             |
| Incidence rate/10,000 person-years | 10.73                                          | 8.37             | 8.38             |             | 6.27                                           | 6.73             | 5.60             |             | 37.66                                          | 14.89            | 16.62            |             |



|                                           |                     |                      |                      |       |                  |                      |                      |       |                     |                      |                              |       |
|-------------------------------------------|---------------------|----------------------|----------------------|-------|------------------|----------------------|----------------------|-------|---------------------|----------------------|------------------------------|-------|
| Adjusted Model                            | 1.00<br>(reference) | 1.00 (0.62-<br>1.63) | 0.92 (0.55-<br>1.54) | 0.728 | 1.00 (reference) | 1.05 (0.62-<br>1.79) | 1.03 (0.59-<br>1.81) | 0.924 | 1.00<br>(reference) | 0.47 (0.10-<br>1.07) | <b>0.42 (0.18-<br/>0.98)</b> | 0.080 |
| <i>Selenium (mcg/d)</i>                   |                     |                      |                      |       |                  |                      |                      |       |                     |                      |                              |       |
| No of participants                        | 3,328               | 3,328                | 3,327                |       | 3,077            | 3,077                | 3,076                |       | 723                 | 723                  | 723                          |       |
| Person-years                              | 28,755              | 28,653               | 28,787               |       | 25,588           | 25,257               | 24,962               |       | 3,971               | 4,014                | 4,237                        |       |
| Cases                                     | 24                  | 21                   | 34                   |       | 15               | 14                   | 18                   |       | 8                   | 7                    | 13                           |       |
| Incidence<br>rate/10,000 person-<br>years | 8.35                | 7.33                 | 11.81                |       | 5.86             | 5.54                 | 7.21                 |       | 20.14               | 17.43                | 30.68                        |       |
| Adjusted Model                            | 1.00<br>(reference) | 0.76 (0.45-<br>1.29) | 1.37 (0.85-<br>2.20) | 0.135 | 1.00 (reference) | 0.65 (0.37-<br>1.16) | 1.29 (0.78-<br>2.14) | 0.226 | 1.00<br>(reference) | 0.65 (0.25-<br>1.67) | 1.40 (0.62-<br>3.18)         | 0.323 |
| <i>Zinc (mg/d)</i>                        |                     |                      |                      |       |                  |                      |                      |       |                     |                      |                              |       |
| No of participants                        | 3,328               | 3,328                | 3,327                |       | 3,077            | 3,077                | 3,076                |       | 723                 | 723                  | 723                          |       |
| Person-years                              | 29,172              | 28,708               | 28,316               |       | 25,867           | 25,124               | 24,816               |       | 3,943               | 3,966                | 4,313                        |       |
| Cases                                     | 31                  | 22                   | 26                   |       | 15               | 14                   | 18                   |       | 12                  | 7                    | 9                            |       |
| Incidence<br>rate/10,000 person-<br>years | 10.63               | 7.66                 | 9.18                 |       | 5.80             | 5.57                 | 7.25                 |       | 30.43               | 17.65                | 20.87                        |       |
| Adjusted Model                            | 1.00<br>(reference) | 0.98 (0.61-<br>1.58) | 1.01 (0.61-<br>1.69) | 0.939 | 1.00 (reference) | 1.04 (0.62-<br>1.76) | 1.26 (0.73-<br>2.19) | 0.367 | 1.00<br>(reference) | 0.79 (0.33-<br>1.87) | 0.94 (0.39-<br>2.23)         | 0.962 |

Abbreviations: CI, confidence interval; HR, hazard ratio; Ref., reference.

- Adjusted model: crude model additionally adjusted for age of menarche (four categories), age at menopause (three categories), alcohol intake (g/d, continuous), BMI (kg/m<sup>2</sup>, continuous), calcium intake (continuous), coffee consumption (two categories), fat intake (E%, continuous), height (cm, continuous), hormone replacement therapy (dichotomous) and its duration (continuous), Mediterranean diet adherence (continuous), months of breastfeeding (continuous), obstetric history (five categories), physical activity (metabolic equivalent-h/week, continuous), relatives with history of breast cancer (three categories), smoking habit (continuous), smoking status (three categories), sugar-sweetened beverages (three categories), total energy intake (Kcal/d, continuous), TV-watching (continuous), use of supplements (dichotomous), and years at university (continuous). For premenopausal women, models were not adjusted for age at menopause, hormone replacement therapy and its duration. For menopausal women, models were additionally adjusted for time since recruitment until the beginning of the time at risk (years, continuous).

Dietary Antioxidant Vitamins and Minerals and Breast Cancer Risk: Prospective Results from the SUN Cohort

**Table s5.** Sensitivity analyses: total (dietary + supplements) intake of vitamins A, C, and E, and zinc. Hazard Ratio (HR) and 95% Confidence Interval (CI) of breast cancer by tertiles of energy-adjusted of total (dietary + supplements) intake of vitamins A, C, and E, and zinc at baseline among female participants of the SUN cohort.

| Variables             | Tertiles of energy-adjusted of total (dietary + supplements) intake |                  |                  | P for trend |
|-----------------------|---------------------------------------------------------------------|------------------|------------------|-------------|
|                       | T1                                                                  | T2               | T3               |             |
| <u>Vitamin A</u>      |                                                                     |                  |                  |             |
| <i>Overall</i>        |                                                                     |                  |                  |             |
| Adjusted Model        | 1.00 (reference)                                                    | 0.83 (0.51-1.38) | 1.05 (0.63-1.74) | 0.715       |
| <i>Premenopausal</i>  |                                                                     |                  |                  |             |
| Adjusted Model        | 1.00 (reference)                                                    | 1.09 (0.58-2.05) | 0.85 (0.41-1.73) | 0.580       |
| <i>Postmenopausal</i> |                                                                     |                  |                  |             |
| Adjusted Model        | 1.00 (reference)                                                    | 0.57 (0.23-1.44) | 1.69 (0.74-3.85) | 0.096       |
| <u>Vitamin C</u>      |                                                                     |                  |                  |             |
| <i>Overall</i>        |                                                                     |                  |                  |             |
| Adjusted Model        | 1.00 (reference)                                                    | 0.82 (0.50-1.36) | 0.93 (0.54-1.61) | 0.877       |
| <i>Premenopausal</i>  |                                                                     |                  |                  |             |
| Adjusted Model        | 1.00 (reference)                                                    | 0.71 (0.41-1.23) | 0.83 (0.46-1.49) | 0.621       |
| <i>Postmenopausal</i> |                                                                     |                  |                  |             |
| Adjusted Model        | 1.00 (reference)                                                    | 1.40 (0.57-3.41) | 2.00 (0.76-5.29) | 0.157       |
| <u>Vitamin E</u>      |                                                                     |                  |                  |             |
| <i>Overall</i>        |                                                                     |                  |                  |             |
| Adjusted Model        | 1.00 (reference)                                                    | 0.84 (0.52-1.38) | 0.83 (0.50-1.39) | 0.533       |
| <i>Premenopausal</i>  |                                                                     |                  |                  |             |
| Adjusted Model        | 1.00 (reference)                                                    | 0.99 (0.58-1.70) | 0.98 (0.56-1.71) | 0.947       |
| <i>Postmenopausal</i> |                                                                     |                  |                  |             |
| Adjusted Model        | 1.00 (reference)                                                    | 0.50 (0.22-1.15) | 0.45 (0.19-1.08) | 0.092       |
| <u>Zinc</u>           |                                                                     |                  |                  |             |
| <i>Overall</i>        |                                                                     |                  |                  |             |
| Adjusted Model        | 1.00 (reference)                                                    | 1.07 (0.66-1.73) | 1.09 (0.65-1.83) | 0.770       |
| <i>Premenopausal</i>  |                                                                     |                  |                  |             |
| Adjusted Model        | 1.00 (reference)                                                    | 1.18 (0.70-2.00) | 1.33 (0.76-2.33) | 0.349       |
| <i>Postmenopausal</i> |                                                                     |                  |                  |             |
| Adjusted Model        | 1.00 (reference)                                                    | 0.81 (0.36-1.85) | 0.95 (0.41-2.17) | 0.959       |

Abbreviations: CI, confidence interval; HR, hazard ratio; Ref., reference.

- Adjusted model: crude model additionally adjusted for age of menarche (four categories), age at menopause (three categories), alcohol intake (g/d, continuous), BMI (kg/m<sup>2</sup>, continuous), calcium intake (continuous), coffee consumption (two categories), fat intake (E%, continuous), height (cm, continuous), hormone replacement therapy (dichotomous) and its duration (continuous), Mediterranean diet adherence (continuous), months of breast-feeding (continuous), obstetric history (five categories), physical activity (metabolic equivalent-h/week, continuous), relatives with history of breast cancer (three categories), smoking habit (continuous), smoking status (three categories), sugar-sweetened beverages (three categories), total energy intake (Kcal/d, continuous), TV-watching (continuous), and years at university (continuous). For premenopausal women, models were not adjusted for age at menopause, hormone replacement therapy and its duration. For postmenopausal women, models were additionally adjusted for time since recruitment until the beginning of the time at risk (years, continuous).
